# Supplementary material for: Correlation of features on OCT with visual acuity and Gass lesion type in Best vitelliform macular dystrophy
Source: HighWire-hosted journal article supplement (doi:10.1136/bmjophth-2021-000860), 2021-12-01
Supplement: bmjophth-2021-000860supp002_data_supplement.pdf [file bmjophth-2021-000860supp002_data_supplement.pdf]

**Supplemental Figure 2:** LogMAR best corrected visual acuity (BCVA) as a function of age at baseline in *BEST1*-associated Best vitelliform macular dystrophy (BVMD).

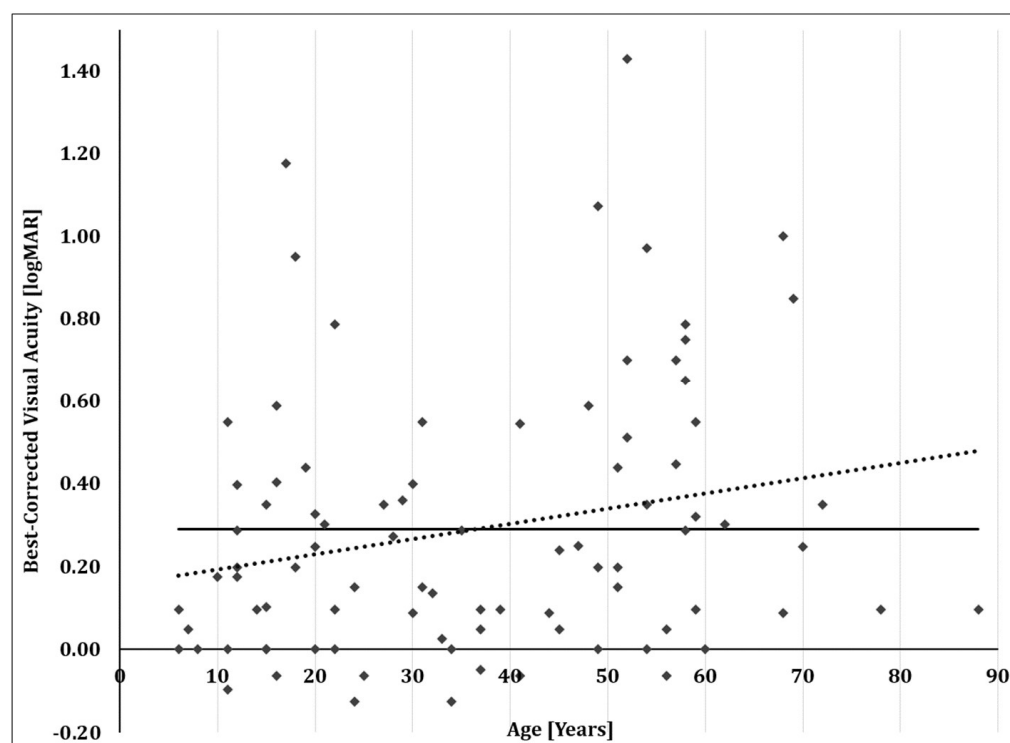

The mean age of included patients was 36.6 years (range 6 to 88 years). The mean LogMAR BCVA in this cohort was 0.29 (median 0.20; range from -0.12 to 1.43), as represented by the solid horizontal line. Each dot represents the mean logMAR best corrected visual acuity (BCVA) between two eyes. The mean LogMAR BCVA (0.29) is shown in the horizontal, solid line. The computed linear regression ( $y=0.0037x+0.1556$ ,  $R^2=0.052$ ,  $p=0.031$ ) is shown in a dotted line.
